# Supplementary material for: Predictors of Antenatal Care Utilization Among the Rohingya Population in the Refugee Camps of Cox's Bazar, Bangladesh
Source: Research Square preprint supplement (doi:10.21203/rs.3.rs-6475112/v1), 2025-05-04
Supplement: Supplementary file 1 [file 5518c7291356a1ef5d4a5d95.docx]

**Supplemental Materials**

Results for constructs related to socioeconomic status

Table A provides details on the factor models. Assets items loaded onto a 1-factor model and the items of the PREI separated into a 3-factor model. The 3-factor solution for the PREI items had the following fit statistics: RMSEA= .049, CFI= .928, TLI= .915, SRMR= .059. The first factor included items that covered questions on resources for basic needs: food consumption and clothing, access to drinking water, healthcare, cooking, toilet and bathing facilities, and satisfaction with household space. This factor was labelled the *Basic Needs Index*. The second factor included conflicts, receiving emotional support or practical help within the household, feeling of acceptance within the community, quarrels within the community, and the opinion that people get emotional support and practical help from others in the community. Factor 2 was labelled *Support and Acceptance*. The negative loadings on this factor suggest that a lower factor score means more support and acceptance among peers. The items loading on the last factor described whether the participants were worrying about petty crimes or violent crimes. The factor was labelled *Safety*. Factor loading and the details of this model can be found in the supplemental materials.

For the assets index, continuous data was used of how many of the following assets the household possessed: chair, bed, fan, grams of gold, solar panel, gas cylinder, table, trunk, and plastic drum. The factor was labelled *Asset* factor. The model provided a good fit (RMSEA= .070, CFI= .920, TLI= .898, SRMR= .040). The asset scores were subsequently divided into quintiles when used in the following regression analyses. The latter was done for comparability to other studies.

**Table A: PREI factors, items, and loadings**

| **Factor 1: Basic needs index** | |
| --- | --- |
|  | |
| Does your household have enough income or resources to pay for basic needs? | 0.567 |
| Does your household restrict food consumption by adults in order for young children to eat? | -0.568 |
| Does your household have access to clean drinking water whenever you need it? | .507 |
| Does your household have enough clothing? | 0.742 |
| Does your household have access to cooking facilities? | 0.483 |
| Does your household have access to adequate toilet facilities? | 0.509 |
| Does your household have access to adequate bathing facilities? | 0.567 |
| Does your accommodation provide enough space for all of the household members? | 0.517 |
| Are you able to get access to health care? | 0.534 |
|  |  |
| **Factor 2: Support and Acceptance** | |
|  | |
| Are there conflicts between people you are living with in the same household? | 0.553 |
| Do you get emotional support that you need from the people you are living with? | -0.570 |
| Do you get practical help that you need from the people you are living with? | -0.487 |
| Do you feel that the community around you accepts your presence? | -0.680 |
| Do you have quarrels with other people in the immediate community? | 0.469 |
| Do people get emotional support in your community when they need it? | -0.647 |
| Do people get help from others in the community when they need it? | -0.653 |
|  |  |
| **Factor 3: Safety** | |
|  | |
| Do you worry about petty crimes (e.g. stolen items) where you are living | 0.868 |
| Do you worry about violent crimes (e.g. robbery) where you are living | 0.757 |
